# Supplementary material
Source: PubMed Central journal article supplement (PMC4306612)
Supplement: NIHMS620175-supplement-01.pdf [file NIHMS620175-supplement-01.pdf]

### Supplemental Table A. Cox Proportional Hazards Regression Models of Mortality and Age-Related Macular Degeneration

|                  | Participants at Risk, N | All-Cause Mortality  |                                         | Cardiovascular-Related Mortality        |                      |                                         |                                         |
|------------------|-------------------------|----------------------|-----------------------------------------|-----------------------------------------|----------------------|-----------------------------------------|-----------------------------------------|
|                  |                         | Number of Events (%) | Model 1 <sup>a</sup><br>(HR and 95% CI) | Model 2 <sup>b</sup><br>(HR and 95% CI) | Number of Events (%) | Model 1 <sup>a</sup><br>(HR and 95% CI) | Model 2 <sup>c</sup><br>(HR and 95% CI) |
| <b>Early AMD</b> |                         |                      |                                         |                                         |                      |                                         |                                         |
| Present          | 1064                    | 458 (43.1%)          | 1.09 (0.98, 1.22)                       | 1.04 (0.92, 1.17)                       | 101 (9.5%)           | 1.18 (0.91, 1.53)                       | 1.14 (0.88, 1.49)                       |
| Absent           | 3569                    | 1128 (31.6%)         | 1 [Reference]                           | 1 [Reference]                           | 213 (6.0%)           | 1 [Reference]                           | 1 [Reference]                           |
| <b>Late AMD</b>  |                         |                      |                                         |                                         |                      |                                         |                                         |
| Present          | 277                     | 156 (56.3%)          | 1.28 (1.07, 1.53)**                     | 1.24 (1.07, 1.45)**                     | 43 (15.5%)           | 1.69 (1.19, 2.41)**                     | 1.68 (1.14, 2.49)**                     |
| Absent           | 4633                    | 1586 (34.2%)         | 1 [Reference]                           | 1 [Reference]                           | 314 (6.8%)           | 1 [Reference]                           | 1 [Reference]                           |

HR = Hazard Ratio, CI = Confidence Interval; \* p-value < 0.05, \*\* p-value < 0.01

<sup>a</sup> Adjusted for age and sex. <sup>b</sup> Adjusted for age and sex and other characteristics in Table 3.

The proportionality assumption of Cox proportional hazards regression was violated for age in these analyses; as a result, analyses were stratified by age at the mean age-at death (e.g. 83 years) and results of the stratified analyses are presented in Table 4.

**Supplemental Table B. Cox Proportional Hazards Regression Models of All-Cause and CVD-Related Mortality by Type of Late Age-Related Macular Degeneration**

| Variable                                           | Participants Ages 67 to 82 years (N=4179) |                                       | Participants Ages 83+ years (N=731) |                                       |
|----------------------------------------------------|-------------------------------------------|---------------------------------------|-------------------------------------|---------------------------------------|
|                                                    | All-Cause Mortality (HR and 95% CI)       | CVD-Related Mortality (HR and 95% CI) | All-Cause Mortality (HR and 95% CI) | CVD-Related Mortality (HR and 95% CI) |
| <b>Pure Geographic Atrophy, present vs absent</b>  | 1.12 (0.61, 2.05)                         | 1.00 (0.36, 2.79)                     | 1.80 (1.03, 3.16)*                  | 3.23 (1.63, 6.38)**                   |
| Sex, female vs male                                | 0.73 (0.59, 0.91)**                       | 0.78 (0.54, 1.13)                     | 0.65 (0.46, 0.92)*                  | 0.65 (0.40, 1.06)                     |
| Smoking Status, former vs never                    | 1.59 (1.27, 1.98)**                       | 1.15 (0.80, 1.65)                     | 1.07 (0.85, 1.36)                   | 0.70 (0.43, 1.13)                     |
| Smoking Status, current vs never                   | 2.23 (1.69, 2.93)**                       | 1.95 (1.24, 3.07)**                   | 1.51 (0.97, 2.36)                   | 1.68 (0.72, 3.90)                     |
| BMI, per kg/m <sup>2</sup>                         | 0.97 (0.95, 0.99)*                        | 0.99 (0.95, 1.03)                     | 0.92 (0.88, 0.96)**                 | 0.92 (0.86, 0.98)**                   |
| Number of Medications, per unit                    | 1.07 (1.04, 1.11)**                       | 1.05 (1.00, 1.12)                     | 1.05 (1.00, 1.10)                   | 1.11 (1.02, 1.20)*                    |
| Self-Reported Health Status, poor vs good          | 1.43 (0.92, 1.62)                         | 1.30 (0.76, 2.22)                     | 1.47 (0.93, 2.31)                   | 1.15 (0.50, 2.66)                     |
| Depressive Symptomology, yes vs no                 | 1.16 (0.94, 1.44)                         | 1.33 (0.82, 2.16)                     | 0.67 (0.42, 1.07)                   | 0.66 (0.27, 1.63)                     |
| Cognitive Status, impaired vs unimpaired           | 2.51 (2.01, 3.13)**                       | 2.41 (1.70, 3.43)**                   | 1.31 (0.93, 1.67)                   | 1.10 (0.68, 1.78)                     |
| Diabetes, yes vs no                                | 1.27 (0.96, 1.41)                         | 1.22 (0.80, 1.87)                     | 1.27 (0.90, 1.79)                   | 1.35 (0.73, 2.49)                     |
| Walking Disability, yes vs no                      | 2.00 (1.59, 2.51)**                       | 1.74 (1.20, 2.51)**                   | 1.01 (0.80, 1.29)                   | 1.09 (0.68, 1.74)                     |
| Total Plasma Cholesterol, per mmol/L               | 0.95 (0.89, 1.01)                         | 1.02 (0.88, 1.19)                     | 0.92 (0.83, 1.02)                   | 1.12 (0.92, 1.36)                     |
| High-Density Lipoprotein Cholesterol, per mmol/L   | 1.07 (0.91, 1.26)                         | 0.84 (0.55, 1.29)                     | 1.04 (0.79, 1.29)                   | 0.50 (0.28, 1.00)                     |
| History of Angina, yes vs no                       | Not Included in Model                     | 1.64 (1.08, 2.49)*                    | Not Included in Model               | 0.95 (0.51, 1.77)                     |
| History of Cancer, yes vs no                       | 1.99 (1.61, 2.46)**                       | Not Included in Model                 | 1.45 (1.01, 2.06)*                  | Not Included in Model                 |
| History of Cardiovascular Disease, yes vs no       | 1.10 (0.95, 1.28)                         | Not Included in Model                 | 0.87 (0.67, 1.13)                   | Not Included in Model                 |
| Record of Clinical Cardiovascular Event, yes vs no | Not Included in Model                     | 1.56 (1.01, 2.42)*                    | Not Included in Model               | 1.24 (0.67, 2.33)                     |
| Microalbuminuria, yes vs no                        | 1.50 (1.14, 1.98)**                       | 1.54 (1.00, 2.37)                     | 1.71 (1.18, 2.47)**                 | 2.21 (1.34, 3.65)**                   |
| Chronic Kidney Disease, yes vs no                  | 1.30 (1.07, 1.59)*                        | 1.33 (0.96, 1.84)                     | 1.21 (0.96, 1.52)                   | 1.20 (0.76, 1.88)                     |
| <b>Exudative AMD, present vs absent</b>            | 1.52 (0.97, 2.37)                         | 1.09 (0.48, 2.49)                     | 1.65 (1.04, 2.62)*                  | 1.60 (0.81, 3.15)                     |
| Sex, female vs male                                | 0.73 (0.59, 0.91)**                       | 0.73 (0.51, 1.06)                     | 0.65 (0.47, 0.90)**                 | 0.64 (0.41, 1.01)                     |
| Smoking Status, former vs never                    | 1.57 (1.26, 1.95)**                       | 1.11 (0.78, 1.58)                     | 1.07 (0.86, 1.34)                   | 0.78 (0.50, 1.22)                     |
| Smoking Status, current vs never                   | 2.29 (1.75, 2.99)**                       | 1.90 (1.22, 2.95)**                   | 1.44 (0.95, 2.18)                   | 2.08 (1.02, 4.25)*                    |
| BMI, per kg/m <sup>2</sup>                         | 0.97 (0.95, 0.99)**                       | 1.00 (0.96, 1.03)                     | 0.92 (0.88, 0.96)**                 | 0.92 (0.87, 0.98)**                   |
| Number of Medications, per unit                    | 1.08 (1.04, 1.12)**                       | 1.06 (1.01, 1.12)*                    | 1.06 (1.00, 1.10)                   | 1.10 (1.02, 1.18)*                    |
| Self-Reported Health Status, poor vs good          | 1.42 (0.92, 1.69)                         | 1.23 (0.73, 2.09)                     | 1.32 (0.86, 2.03)                   | 1.09 (0.50, 2.38)                     |
| Depressive Symptomology, yes vs no                 | 1.15 (0.93, 1.42)                         | 1.28 (0.80, 2.07)                     | 0.65 (0.42, 1.02)                   | 0.62 (0.27, 1.44)                     |
| Cognitive Status, impaired vs unimpaired           | 2.32 (1.87, 2.89)**                       | 2.36 (1.67, 3.33)**                   | 1.63 (1.20, 2.21)**                 | 1.42 (0.92, 2.19)                     |
| Diabetes, yes vs no                                | 1.24 (0.94, 1.48)                         | 1.20 (0.79, 1.82)                     | 1.46 (0.96, 1.73)                   | 1.30 (0.72, 2.35)                     |
| Walking Disability, yes vs no                      | 1.98 (1.59, 2.47)**                       | 1.75 (1.22, 2.50)**                   | 1.24 (0.90, 1.71)                   | 1.17 (0.75, 1.82)                     |
| Total Plasma Cholesterol, per mmol/L               | 0.96 (0.90, 1.01)                         | 1.04 (0.90, 1.21)                     | 0.91 (0.82, 1.00)                   | 1.10 (0.91, 1.32)                     |
| High-Density Lipoprotein Cholesterol, per mmol/L   | 1.05 (0.90, 1.23)                         | 0.83 (0.55, 1.26)                     | 1.07 (0.82, 1.40)                   | 0.57 (0.32, 1.00)                     |
| History of Angina, yes vs no                       | Not Included in Model                     | 1.66 (1.10, 2.51)*                    | Not Included in Model               | 1.08 (0.61, 1.91)                     |
| History of Cancer, yes vs no                       | 1.96 (1.59, 2.42)**                       | Not Included in Model                 | 1.08 (0.83, 1.40)                   | Not Included in Model                 |
| History of Cardiovascular Disease, yes vs no       | 1.12 (0.97, 1.30)                         | Not Included in Model                 | 0.88 (0.68, 1.13)                   | Not Included in Model                 |
| Record of Clinical Cardiovascular Event, yes vs no | Not Included in Model                     | 1.51 (0.98, 2.33)                     | Not Included in Model               | 1.11 (0.62, 2.00)                     |
| Microalbuminuria, yes vs no                        | 1.53 (1.17, 2.00)**                       | 1.53 (1.01, 2.34)*                    | 1.86 (1.32, 2.63)**                 | 2.07 (1.28, 3.35)**                   |
| Chronic Kidney Disease, yes vs no                  | 1.28 (1.05, 1.56)*                        | 1.36 (0.99, 1.87)                     | 1.18 (0.95, 1.47)                   | 1.30 (0.85, 2.00)                     |

In participants aged 67 to 82 years, pure geographic atrophy and exudative AMD were present in 63 (1.5%) and 96 (2.3%), respectively; in participants aged 83+ years, pure geographic atrophy and exudative AMD were present in 52 (7.8%) and 66 (9.0%), respectively.

HR = Hazard Ratio, CI = Confidence Interval, \* p-value < 0.05, \*\* p-value < 0.01 ; “ Not Included in Model” indicates a variable that did not meet the AIC criteria as outlined in the methods section.
